# Supplementary material for: Performance Analysis of Multi-Layer Fender Design under Impacted Vessel
Source: Preprints.org preprint supplement (doi:10.20944/preprints202310.1407.v1), 2023-10-23
Supplement: Supplementary file 1 [file supplementary]

## Sheet: Vessel Deformation
Vessel Material	Fender F1	Fender F2	Fender F3
Steel Vessel	1.206	1.1633	1.2019
Aluminum Vessel	1.2154	1.2066	1.2075
Polyethylene Vessel	1.2162	1.216	1.2511
Bamboo Wood Vessel	1.215	1.2133	1.2111
Fibre-Reinforced Plastic Vessel	1.2121	1.2096	1.2058
Average Values	1.21294	1.20176	1.21548

## Sheet: Vessel Internal Energy
Vessel Material	Fender F1	Fender F2	Fender F3
Steel Vessel	84810	28427	147850
Aluminum Vessel	74022	110000	778110
Polyethylene Vessel	194060	5417300	5331500
Bamboo-Wood Vessel	158050	338080	265460
Fibre-Reinforced Plastic Vessel	2417200	2260200	936450
Average Mean Value	585628	1.6308e+06	1491874

## Sheet: Structure Deformation
Vessel Material	Fender F1	Fender F2	Fedner F3
Steel Vessel	0.0254	0.007	0.0276
Aluminium Vessel	0.023	0.0331	0.027
Polyethylene Vessel	0.0079	0.035	0.0359
Bamboo Wood Vessel	0.0106	0.0248	0.0243
Fibre-Reinforced Plastic Vessel	0.0437	0.0395	0.0462
Average Values	0.02212	0.02788	0.0322

## Sheet: Structure Internal Energy
Vessel Material	Fender F1	Fender F2	Fender F3
Steel Vessel	13685000	1949400	13659000
Aluminum Vessel	4297900	28207000	10600000
Polyethylene Vessel	273120	5483400	7545600
Bamboo-Wood Vessel	986830	6601400	9645700
Fibre-Reinforced Plastic Vessel	37171000	49770000	41128000
Average Mean Value	11282770	18402240	16515660
